# Supplementary material for: Phenotypic and molecular characterization of β-lactamase-producing Klebsiella species among children discharged from hospital in Western Kenya
Source: PubMed Central journal article supplement (PMC11040804; doi:10.1186/s12866-024-03284-7), 2024-04-23
Supplement: 12866_2024_3284_MOESM1_ESM.pdf [file 12866_2024_3284_MOESM1_ESM.pdf]

**Table S1:** Characteristics of children enrolled in the study.

|                                                  | <b>KISII</b><br>N=144 (iii) | <b>HOMABAY</b><br>N=101 (iii) | <b>Total</b><br>N=245 (iii) |
|--------------------------------------------------|-----------------------------|-------------------------------|-----------------------------|
| <b>Child Characteristics</b>                     |                             |                               |                             |
| <b>Age (months)</b>                              |                             |                               |                             |
| 0-5                                              | 31 (22%)                    | 9 (9%)                        | 40 (16%)                    |
| 6-11                                             | 31 (22%)                    | 26 (26%)                      | 57 (23%)                    |
| 12-23                                            | 33 (23%)                    | 32 (32%)                      | 65 (27%)                    |
| 24-59                                            | 49 (34%)                    | 34 (34%)                      | 83 (34%)                    |
| <b>Sex</b>                                       |                             |                               |                             |
| Male                                             | 86 (60%)                    | 54 (53%)                      | 140 (57%)                   |
| Female                                           | 58 (40%)                    | 47 (47%)                      | 105 (43%)                   |
| <b>Breastfeeding<sup>i</sup></b>                 |                             |                               |                             |
| Exclusively breastfed                            | 43 (30%)                    | 66 (65%)                      | 109 (44%)                   |
| Partially breastfed                              | 86 (59%)                    | 35 (35%)                      | 121 (50%)                   |
| Unknown                                          | 15 (10%)                    | 0 (0%)                        | 15 (6%)                     |
| <b>Child HIV status<sup>ii</sup></b>             |                             |                               |                             |
| HIV unexposed                                    | 134 (93%)                   | 70 (69%)                      | 204 (83%)                   |
| HIV exposed, uninfected/infection status unknown | 8 (6%)                      | 30 (30%)                      | 38 (16%)                    |
| <b>Underweight (WAZ &lt; -2)</b>                 |                             |                               |                             |
| WAZ ≥ -2                                         | 117 (81%)                   | 87 (86%)                      | 204 (83%)                   |
| WAZ < -2                                         | 27 (19%)                    | 14 (14%)                      | 41 (17%)                    |
| <b>Stunting (HAZ/LAZ &lt; -2)</b>                |                             |                               |                             |
| HAZ ≥ -2                                         | 99 (69%)                    | 82 (82%)                      | 181 (74%)                   |
| HAZ < -2                                         | 44 (31%)                    | 18 (18%)                      | 62 (26%)                    |
| <b>Acute malnutrition</b>                        |                             |                               |                             |
| None                                             | 123 (85%)                   | 84 (83%)                      | 207 (84%)                   |
| MAM                                              | 8 (6%)                      | 10 (10%)                      | 18 (7%)                     |
| SAM                                              | 13 (9%)                     | 7 (7%)                        | 20 (8%)                     |
| <b>Vaccination Status<sup>iv</sup></b>           |                             |                               |                             |
| <b>Complete essential vaccination for age</b>    |                             |                               |                             |
| No                                               | 79 (55%)                    | 69 (68%)                      | 148 (60%)                   |
| Yes                                              | 65 (45%)                    | 32 (32%)                      | 97 (40%)                    |
| <b>Hospitalization Information</b>               |                             |                               |                             |
| <b>Length of hospital stay</b>                   |                             |                               |                             |
| <4 days                                          | 54 (38%)                    | 48 (48%)                      | 102 (42%)                   |
| ≥4 days                                          | 87 (62%)                    | 53 (52%)                      | 140 (58%)                   |
| <b>Discharge diagnosis</b>                       |                             |                               |                             |
| Diarrhoea                                        | 10 (7%)                     | 9 (9%)                        | 19 (8%)                     |
| URTI                                             | 3 (2%)                      | 1 (1%)                        | 4 (2%)                      |
| Pneumonia                                        | 39 (27%)                    | 18 (18%)                      | 57 (23%)                    |
| Malaria                                          | 18 (13%)                    | 23 (23%)                      | 41 (17%)                    |
| Malnutrition                                     | 12 (8%)                     | 7 (7%)                        | 19 (8%)                     |

|                                                           |            |           |           |
|-----------------------------------------------------------|------------|-----------|-----------|
| Other diseases                                            | 60 (42%)   | 43 (43%)  | 103 (42%) |
| <b>Any antibiotic used during admission</b>               |            |           |           |
| No                                                        | 6 (4%)     | 20 (20%)  | 26 (11%)  |
| Yes                                                       | 138 (96%)  | 81 (80%)  | 219 (89%) |
| <b>Ceftriaxone used during admission <sup>v</sup></b>     |            |           |           |
| No                                                        | 106 (74%)  | 62 (61%)  | 168 (69%) |
| Yes                                                       | 38 (26%)   | 39 (39%)  | 77 (31%)  |
| <b>Ciprofloxacin used during admission <sup>v</sup></b>   |            |           |           |
| No                                                        | 144 (100%) | 99 (98%)  | 243 (99%) |
| Yes                                                       | 0 (0%)     | 2 (2%)    | 2 (1%)    |
| <b>Cefuroxime used during admission <sup>v</sup></b>      |            |           |           |
| No                                                        | 140 (97%)  | 100 (99%) | 240 (98%) |
| Yes                                                       | 4 (3%)     | 1 (1%)    | 5 (2%)    |
| <b>Gentamicin used during admission <sup>v</sup></b>      |            |           |           |
| No                                                        | 42 (29%)   | 61 (60%)  | 103 (42%) |
| Yes                                                       | 102 (71%)  | 40 (40%)  | 142 (58%) |
| <b>Chloramphenicol used during admission <sup>v</sup></b> |            |           |           |
| No                                                        | 127 (88%)  | 99 (98%)  | 226 (92%) |
| Yes                                                       | 17 (12%)   | 2 (2%)    | 19 (8%)   |
| <b>Penicillin used during admission <sup>v</sup></b>      |            |           |           |
| No                                                        | 23 (16%)   | 57 (56%)  | 80 (33%)  |
| Yes                                                       | 121 (84%)  | 44 (44%)  | 165 (67%) |
| <b>Household Information</b>                              |            |           |           |
| <b>Caregiver reported income</b>                          |            |           |           |
| Income ≥ 5000 ksh                                         | 50 (35%)   | 17 (17%)  | 67 (27%)  |
| Income < 5000 ksh                                         | 90 (63%)   | 74 (73%)  | 164 (67%) |
| Unknown or refuse to answer                               | 4 (3%)     | 10 (10%)  | 14 (6%)   |
| <b>Crowding (&gt;2 persons per room)</b>                  |            |           |           |
| No                                                        | 98 (68%)   | 32 (32%)  | 130 (53%) |
| Yes                                                       | 46 (32%)   | 69 (68%)  | 115 (47%) |
| <b>Improved water source</b>                              |            |           |           |
| No                                                        | 25 (17%)   | 28 (28%)  | 53 (22%)  |
| Yes                                                       | 119 (83%)  | 73 (72%)  | 192 (78%) |
| <b>Treated drinking water</b>                             |            |           |           |
| No                                                        | 78 (56%)   | 23 (23%)  | 101 (42%) |
| Yes                                                       | 62 (44%)   | 76 (77%)  | 138 (58%) |
| <b>Toilet</b>                                             |            |           |           |
| Private for household only                                | 81 (57%)   | 35 (35%)  | 116 (48%) |
| Shared with ≥1 other household                            | 61 (43%)   | 53 (52%)  | 114 (47%) |
| Open defecation                                           | 1 (1%)     | 13 (13%)  | 14 (6%)   |

Abbreviations: HIV - Human Immunodeficiency Virus; HAZ- height-for-age; LAZ- length-for-age  
MAM- moderate acute malnutrition; SAM-severe acute malnutrition; WAZ- weight-for-age; URTI  
– upper respiratory tract infection

**Footnotes**

- i. *Whether the child is currently breastfeeding ( $\leq 6$  months old) or if the caregiver practiced breastfeeding when the child was under 6 months old.*
- ii. *Six children had exposure and infection status unknown and were excluded.*
- iii. *Column percentages*
- iv. *Completed all essential vaccination defined as having complete vaccination for Pneumococcal, Rotavirus, DPT, Measles and BCG up until the age of the child allowing a 2-week margin.*
- v. *Include both children who received any antibiotic and those that did not receive any antibiotic during hospitalization.*
