# Supplementary material for: Phenotypic and molecular characterization of β-lactamase-producing Klebsiella species among children discharged from hospital in Western Kenya
Source: PubMed Central journal article supplement (PMC11040804; doi:10.1186/s12866-024-03284-7), 2024-04-23
Supplement: 12866_2024_3284_MOESM2_ESM.pdf [file 12866_2024_3284_MOESM2_ESM.pdf]

## Appendix II

**Table S2:** Predictors of ESBL in *Klebsiella* isolated from stool samples of the participating children. Model 1 and Model 2 presents results from the univariable Poisson regression and the adjusted multivariable Poisson regression model (adjusted for age, sex, and site only) respectively with robust standard errors. The “ESBL +” and “ESBL -” denote the presence and absence of the ESBL in the isolated *Klebsiella* from stool samples.

|                                 | ESBL+<br>N=154 (%)<br>iii | ESBL-<br>N=91 (%) iii | Model 1 |              |         | Model 2    |              |         |
|---------------------------------|---------------------------|-----------------------|---------|--------------|---------|------------|--------------|---------|
|                                 |                           |                       | PR iv   | 95% CI       | p-value | Adj. PR iv | 95% CI       | p-value |
| <b>Location of the facility</b> |                           |                       |         |              |         |            |              |         |
| KISII                           | 96 (62%)                  | 48 (53%)              | Ref     |              |         |            |              |         |
| HOMABAY                         | 58 (38%)                  | 43 (47%)              | 0.86    | (0.70, 1.06) | 0.152   | 0.85       | (0.68, 1.03) | 0.092   |
| <b>Child Characteristics</b>    |                           |                       |         |              |         |            |              |         |
| Age (months)                    | 14 (9-29)                 | 18 (7-36)             | 1.00    | (0.99, 1.01) | 0.696   | 1.00`      | (0.99, 1.01) | 0.722   |
| <b>Age (months)</b>             |                           |                       |         |              |         |            |              |         |
| 0-5                             | 23 (15%)                  | 17 (19%)              | Ref     |              |         |            |              |         |
| 6-11                            | 37 (24%)                  | 20 (22%)              | 1.13    | (0.81, 1.57) | 0.469   | 1.18       | (0.84, 1.64) | 0.342   |
| 12-23                           | 45 (29%)                  | 20 (22%)              | 1.20    | (0.88, 1.65) | 0.244   | 1.26       | (0.92, 1.73) | 0.152   |
| 24-59                           | 49 (32%)                  | 34 (37%)              | 1.03    | (0.74, 1.42) | 0.872   | 1.06       | (0.77, 1.46) | 0.734   |
| <b>Sex</b>                      |                           |                       |         |              |         |            |              |         |
| Male                            | 88 (57%)                  | 52 (57%)              | Ref     |              |         |            |              |         |
| Female                          | 66 (43%)                  | 39 (43%)              | 1.00    | (0.82, 1.22) | 1.000   | 1.02       | (0.84, 1.46) | 0.874   |
| <b>Breastfeeding i</b>          |                           |                       |         |              |         |            |              |         |
| Exclusively breastfed           | 60 (39%)                  | 49 (54%)              | Ref     |              |         |            |              |         |
| Partially breastfed             | 84 (55%)                  | 37 (41%)              | 1.26    | (1.03, 1.55) | 0.028   | 1.20       | (0.96, 1.50) | 0.107   |
| Unknown                         | 10 (6%)                   | 5 (5%)                | 1.21    | (0.81, 1.80) | 0.344   | 1.15       | (0.76, 1.73) | 0.502   |
| <b>Child HIV status ii</b>      |                           |                       |         |              |         |            |              |         |

|                                                           |           |          |      |               |                  |      |               |                  |
|-----------------------------------------------------------|-----------|----------|------|---------------|------------------|------|---------------|------------------|
| HIV unexposed                                             | 129 (85%) | 75 (83%) | Ref  |               |                  |      |               |                  |
| HIV positive or exposed                                   | 23 (15%)  | 15 (17%) | 0.96 | (0.72, 1.26)  | 0.757            | 1.08 | (0.81, 1.46)  | 0.590            |
| <b>Underweight (WAZ &lt; -2)</b>                          |           |          |      |               |                  |      |               |                  |
| WAZ ≥ -2                                                  | 130 (84%) | 74 (81%) | Ref  |               |                  |      |               |                  |
| WAZ < -2                                                  | 24 (16%)  | 17 (19%) | 0.92 | (0.70, 1.21)  | 0.550            | 0.89 | (0.67, 1.17)  | 0.399            |
| <b>Stunting (HAZ/LAZ &lt; -2)</b>                         |           |          |      |               |                  |      |               |                  |
| HAZ ≥ -2                                                  | 114 (75%) | 67 (74%) | Ref  |               |                  |      |               |                  |
| HAZ < -2                                                  | 38 (25%)  | 24 (26%) | 0.97 | (0.78, 1.22)  | 0.815            | 0.96 | (0.76, 1.21)  | 0.728            |
| <b>Acute malnutrition</b>                                 |           |          |      |               |                  |      |               |                  |
| None                                                      | 128 (83%) | 79 (87%) | Ref  |               |                  |      |               |                  |
| MAM                                                       | 12 (8%)   | 6 (7%)   | 1.08 | (0.76, 1.52)  | 0.669            | 1.07 | (0.75, 1.52)  | 0.700            |
| SAM                                                       | 14 (9%)   | 6 (7%)   | 1.13 | (0.83, 1.54)  | 0.428            | 1.07 | (0.78, 1.47)  | 0.670            |
| <b>Vaccination Status <sup>v</sup></b>                    |           |          |      |               |                  |      |               |                  |
| <b>Complete essential vaccination for current age</b>     |           |          |      |               |                  |      |               |                  |
| No                                                        | 90 (58%)  | 58 (64%) | Ref  |               |                  |      |               |                  |
| Yes                                                       | 64 (42%)  | 33 (36%) | 1.08 | (0.89, 1.32)  | 0.408            | 1.07 | (0.88, 1.29)  | 0.504            |
| <b>Hospitalization Information</b>                        |           |          |      |               |                  |      |               |                  |
| <b>Length of hospital stay</b>                            |           |          |      |               |                  |      |               |                  |
| <4 days                                                   | 51 (34%)  | 51 (57%) | Ref  |               |                  |      |               |                  |
| ≥4 days                                                   | 101 (66%) | 39 (43%) | 1.44 | (1.16, 1.80)  | 0.001            | 1.42 | (1.14, 1.77)  | 0.002            |
| <b>Any antibiotic used during admission <sup>vi</sup></b> |           |          |      |               |                  |      |               |                  |
| No                                                        | 4 (3%)    | 22 (24%) | Ref  |               |                  |      |               |                  |
| Yes                                                       | 150 (97%) | 69 (76%) | 4.45 | (1.80, 11.04) | <b>0.001</b>     | 4.51 | (1.79, 11.37) | <b>0.001</b>     |
| <b>Ceftriaxone use during admission <sup>vi</sup></b>     |           |          |      |               |                  |      |               |                  |
| No                                                        | 85 (57%)  | 57 (83%) | Ref  |               |                  |      |               |                  |
| Yes                                                       | 65 (43%)  | 12 (17%) | 1.43 | (1.21, 1.69)  | <b>&lt;0.001</b> | 1.42 | (1.19, 1.71)  | <b>&lt;0.001</b> |
| <b>Gentamicin use during admission <sup>vi</sup></b>      |           |          |      |               |                  |      |               |                  |
| No                                                        | 64 (43%)  | 13 (19%) | Ref  |               |                  |      |               |                  |

|                                                    |           |          |      |              |        |      |              |                  |
|----------------------------------------------------|-----------|----------|------|--------------|--------|------|--------------|------------------|
| Yes                                                | 86 (57%)  | 56 (81%) | 0.72 | (0.61, 0.85) | <0.001 | 0.72 | (0.60, 0.87) | <b>&lt;0.001</b> |
| Chloramphenicol use during admission <sup>vi</sup> |           |          |      |              |        |      |              |                  |
| No                                                 | 134 (89%) | 66 (96%) | Ref  |              |        |      |              |                  |
| Yes                                                | 16 (11%)  | 3 (4%)   | 1.27 | (1.02, 1.58) | 0.034  | 1.28 | (1.01, 1.62) | <b>0.042</b>     |
| Penicillin use during admission <sup>vi</sup>      |           |          |      |              |        |      |              |                  |
| No                                                 | 44 (29%)  | 10 (14%) | Ref  |              |        |      |              |                  |
| Yes                                                | 106 (71%) | 59 (86%) | 0.78 | (0.66, 0.93) | 0.005  | 0.77 | (0.62, 0.95) | 0.014            |
| <b>Household Information</b>                       |           |          |      |              |        |      |              |                  |
| Caregiver reported income                          |           |          |      |              |        |      |              |                  |
| Income ≥ 5000 ksh                                  | 44 (29%)  | 23 (25%) | Ref  |              |        |      |              |                  |
| Income < 5000 ksh                                  | 103 (67%) | 61 (67%) | 0.96 | (0.78, 1.18) | 0.677  | 1.00 | (0.81, 1.24) | 0.976            |
| Unknown or refuse to answer                        | 7 (5%)    | 7 (8%)   | 0.76 | (0.44, 1.32) | 0.334  | 0.83 | (0.47, 1.47) | 0.520            |
| Crowding (>2 persons per room)                     |           |          |      |              |        |      |              |                  |
| No                                                 | 86 (56%)  | 44 (48%) | Ref  |              |        |      |              |                  |
| Yes                                                | 68 (44%)  | 47 (52%) | 0.89 | (0.73, 1.09) | 0.261  | 0.93 | (0.75, 1.14) | 0.472            |
| Improved water source                              |           |          |      |              |        |      |              |                  |
| No                                                 | 32 (21%)  | 21 (23%) | Ref  |              |        |      |              |                  |
| Yes                                                | 122 (79%) | 70 (77%) | 1.05 | (0.82, 1.34) | 0.681  | 1.03 | (0.81, 1.31) | 0.836            |
| Treated drinking water                             |           |          |      |              |        |      |              |                  |
| No                                                 | 56 (37%)  | 45 (52%) | Ref  |              |        |      |              |                  |
| Yes                                                | 96 (63%)  | 42 (48%) | 1.28 | (1.04, 1.58) | 0.022  | 1.38 | (1.12, 1.71) | 0.003            |
| Toilet                                             |           |          |      |              |        |      |              |                  |
| Private, for household only                        | 74 (48%)  | 42 (46%) | Ref  |              |        |      |              |                  |
| Shared with ≥1 other household                     | 71 (46%)  | 43 (47%) | 0.98 | (0.80, 1.19) | 0.813  | 0.98 | (0.80, 1.20) | 0.847            |
| Open defecation                                    | 8 (5%)    | 6 (7%)   | 0.90 | (0.56, 1.44) | 0.650  | 1.00 | (0.60, 1.65) | 0.993            |

Abbreviations: HAZ- height-for-age; WAZ- weight-for-age; LAZ- length-for-age; MAM- moderate acute malnutrition; SAM-severe acute malnutrition; Adj. Prevalence Ratio- adjusted prevalence ratio

#### Footnotes

- i. *Whether the child is currently breastfeeding ( $\leq 6$  months old) or if the mother practiced breastfeeding when the child was under 6 months old.*
- ii. *Six children had exposure and infection status unknown and were excluded*
- iii. *Column percentages*
- iv. *PR is the Prevalence Ratio whilst "Adj. PR" is the adjusted prevalence ratio (adjusted for sex, age and site)*
- v. *Completed all essential vaccination defined as having complete age-appropriate vaccination for Pneumococcal, Rotavirus, DPT, Measles and BCG up until the age of the child allowing a 2-week margin.*
- vi. *Among children who received at least one antibiotic during hospitalization (antibiotic of interest vs. other antibiotics).*
